# Supplementary material
Source: PubMed Central journal article supplement (PMC3863986)
Supplement: NIHMS56006-supplement-01.pdf [file NIHMS56006-supplement-01.pdf]

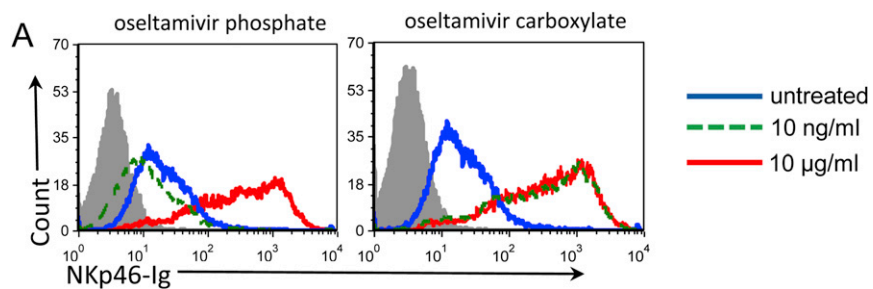

**Figure S1. Efficiency of NA Inhibitors, Related to Figure 2**

Influenza virus-infected JEG3 cells treated with various concentrations of oseltamivir phosphate (left histogram) or oseltamivir carboxylate (right histogram) were stained with NKp46-Ig. The blue empty histogram shows the staining of influenza virus-infected cells with NKp46-Ig. The red empty histogram shows the NKp46-Ig staining of influenza virus-infected cells following treatment with 10 µg/ml of oseltamivir phosphate/ carboxylate, and the green dash empty histogram shows the NKp46-Ig staining following treatment with 10 ng/ml of oseltamivir phosphate/carboxylate. The filled gray histogram shows the staining of the secondary mAb only. One representative experiment out of two is shown.
